# Supplementary material
Source: publisher site journal article supplement (https://www.dovepress.com/article/591828)
Supplement: Supplementary file 1 [file 591828%20Supplementary%20Material.doc]

# **Regional Analgesia Techniques Following Open Hepatectomy: A Systematic Review and Network Meta-analysis**

**Contents**

[**Section 1. Search Strategy of Pubmed 1**](#__RefHeading___Toc50023580)

[**Section 2. Resting VAS at 6 h 2**](#__RefHeading___Toc50023580)

[**Section 3. Resting VAS at 12 h 5**](#__RefHeading___Toc50023583)

[**Section 4. Resting VAS at 24 h 8**](#__RefHeading___Toc50023584)

[**Section 5. Movement VAS at 6 h 11**](#__RefHeading___Toc50023585)

[**Section 6. Movement VAS at 12 h 14**](#__RefHeading___Toc50023586)

[**Section 7. Movement VAS at 24 h 17**](#__RefHeading___Toc50023586)

[**Section 8. PONV 18**](#__RefHeading___Toc50023589)

## [Section 1. Search strategy of Pubmed](#__RefHeading___Toc50023580)

| Table S1. Search strategy of Pubmed | | | |
| --- | --- | --- | --- |
| Search number | Query | Search Details | Results |
| 1 | hepatectomy | "hepatectomy"[MeSH Terms] OR "hepatectomy"[All Fields] OR "hepatectomies"[All Fields] | 48,197 |
| 2 | liver | "liver"[MeSH Terms] OR "liver"[All Fields] OR "livers"[All Fields] OR "liver s"[All Fields] | 1,427,981 |
| 3 | pain | "pain"[MeSH Terms] OR "pain"[All Fields] | 1,170,780 |
| 4 | block | "block"[All Fields] OR "blocked"[All Fields] OR "blocking"[All Fields] OR "blockings"[All Fields] OR "blocks"[All Fields] | 800,395 |
| 5 | (liver) OR (hepatectomy) | "liver"[MeSH Terms] OR "liver"[All Fields] OR "livers"[All Fields] OR "liver s"[All Fields] OR "hepatectomy"[MeSH Terms] OR "hepatectomy"[All Fields] OR "hepatectomies"[All Fields] | 1,431,285 |
| 6 | (((liver) OR (hepatectomy)) AND (block)) AND (pain) | ("liver"[MeSH Terms] OR "liver"[All Fields] OR "livers"[All Fields] OR "liver s"[All Fields] OR ("hepatectomy"[MeSH Terms] OR "hepatectomy"[All Fields] OR "hepatectomies"[All Fields])) AND ("block"[All Fields] OR "blocked"[All Fields] OR "blocking"[All Fields] OR "blockings"[All Fields] OR "blocks"[All Fields]) AND ("pain"[MeSH Terms] OR "pain"[All Fields]) | 618 |

## Section 2. Resting VAS at 6 h

|  |
| --- |
| Figure S2A. Network map of resting VAS at 6 h |

|  |
| --- |
| Figure S2B. Network forest plot of resting VAS at 6 h |

|  |
| --- |
| Figure S2C. SUCRA of resting VAS at 6 h. Control (63.6), EOIPB (55.9), ESPB (17.1), TANB (41.7), TAPB (53.1), cTAPB (66.6), sTAPB (52.1). |

| Table S2A. Netleague of resting VAS at 6 h | | | | | | |
| --- | --- | --- | --- | --- | --- | --- |
| Control |  |  |  |  |  |  |
| 3.31  (-10.42,17.05) | sTAPB |  |  |  |  |  |
| -1.10  (-10.15,7.95) | -2.09  (-14.82,10.64) | cTAPB |  |  |  |  |
| 0.92  (-5.48,7.31) | -0.07  (-11.07,10.93) | 2.02  (-9.06,13.10) | TAPB |  |  |  |
| 2.46  (-6.60,11.52) | 1.47  (-11.26,14.21) | 3.56  (-9.24,16.37) | 1.54  (-9.55,12.63) | TANB |  |  |
| 5.22  (-0.05,10.49) | 4.23  (-6.16,14.62) | 6.32  (-4.15,16.79) | 4.30  (-3.99,12.59) | 2.76  (-7.72,13.24) | ESPB |  |
| 0.54  (-12.10,13.18) | -0.45  (-9.47,8.57) | 1.64  (-13.91,17.18) | -0.38  (-14.55,13.78) | -1.92  (-17.48,13.63) | -4.68  (-18.38,9.01) | EOIPB |

| Table S2B. Node-splitting of resting VAS at 6 h | | | | | | | |
| --- | --- | --- | --- | --- | --- | --- | --- |
| Side | Direct | | Indirect | | Difference | | P>|z| |
| Coef. | Std. Err. | Coef. | Std. Err. | Coef. | Std. Err. |
| Control vs. ESPB | -5.252965 | 2.694991 | -1.815582 | 6.405671 | -3.437383 | 6.950244 | 0.621 |
| Control vs. sTAPB | -1.006059 | 4.608819 | -4.19131 | 5.239384 | 3.185251 | 6.977991 | 0.648 |
| EOIPB vs. sTAPB | -.4461168 | 4.125653 | -4.829595 | 63.95187 | 4.383479 | 64.0848 | 0.945 |
| ESPB vs. sTAPB | .8683972 | 4.619213 | 4.284545 | 5.306297 | -3.416148 | 7.035191 | 0.627 |

## Section 3. Resting VAS at 12 h

|  |
| --- |
| Figure S3A. Network map of resting VAS at 12 h |

|  |
| --- |
| Figure S3B. Network forest plot of resting VAS at 12 h |

|  |
| --- |
| Figure S3C. SUCRA of resting VAS at 12 h. Control (64.8), EOIPB (40.2), ESPB (27.1), TANB (53.8), TAPB (60.2), cTAPB (57.8), cTPVB (59.1), sTAPB (37.0) |

| Table S3A. Netleague of resting VAS at 12 h | | | | | | | |
| --- | --- | --- | --- | --- | --- | --- | --- |
| Control |  |  |  |  |  |  |  |
| 6.66  (-13.71,27.02) | sTAPB |  |  |  |  |  |  |
| 0.71  (-18.20,19.61) | -5.95  (-33.74,21.83) | cTPVB |  |  |  |  |  |
| 0.91  (-17.99,19.82) | -5.74  (-33.53,22.04) | 0.21  (-26.53,26.94) | cTAPB |  |  |  |  |
| 0.34  (-13.03,13.71) | -6.32  (-30.68,18.04) | -0.37  (-23.52,22.79) | -0.58  (-23.73,22.58) | TAPB |  |  |  |
| 2.71  (-16.21,21.62) | -3.95  (-31.74,23.84) | 2.00  (-24.74,28.74) | 1.79  (-24.95,28.54) | 2.37  (-20.79,25.53) | TANB |  |  |
| 8.26  (-2.49,19.00) | 1.60  (-16.45,19.65) | 7.55  (-14.20,29.30) | 7.34  (-14.41,29.09) | 7.92  (-9.23,25.07) | 5.55  (-16.21,27.30) | ESPB |  |
| 6.68  (-20.36,33.72) | 0.02  (-18.70,18.75) | 5.97  (-27.02,38.97) | 5.77  (-27.23,38.76) | 6.34  (-23.82,36.51) | 3.97  (-29.02,36.97) | -1.58  (-27.09,23.94) | EOIPB |

| Table S3B. Node-splitting of resting VAS at 12 h | | | | | | | |
| --- | --- | --- | --- | --- | --- | --- | --- |
| Side | Direct | | Indirect | | Difference | | P>|z| |
| Coef. | Std. Err. | Coef. | Std. Err. | Coef. | Std. Err. |
| Control vs. ESPB | -8.691624 | 5.802021 | -.439513 | 24.4486 | -8.252111 | 25.12765 | 0.743 |
| EOIPB vs. sTAPB | .3136285 | 9.903493 | -14.76955 | 69.25377 | 15.08318 | 69.95828 | 0.829 |
| EOIPB vs. sTAPB | .694739 | 9.962275 | 10.52228 | 30.39677 | -9.827539 | 31.98767 | 0.759 |

## Section 4. Resting VAS at 24 h

|  |
| --- |
| Figure S4A. Network map of resting VAS at 24 h |

|  |
| --- |
| Figure S4B. Network forest plot of resting VAS at 24 h |

|  |
| --- |
| Figure S4C. SUCRA of resting VAS at 24 h. Control (56.6), EOIPB (50.1), ESPB (50.9), QLB (51.2), TANB (38.5), TAPB (52.6) cTAPB (44.5), cTPVB (54.2), sTAPB (51.4) |

| Table S4A. Netleague of resting VAS at 24 h | | | | | | | | |
| --- | --- | --- | --- | --- | --- | --- | --- | --- |
| Control |  |  |  |  |  |  |  |  |
| 0.15 (-16.51,16.80) | sTAPB |  |  |  |  |  |  |  |
| 2.46 (-14.20,19.12) | -0.70 (-23.88,22.48) | cTPVB |  |  |  |  |  |  |
| 0.36 (-9.26,9.97) | 1.62 (-21.57,24.80) | 2.31 (-21.24,25.87) | cTAPB |  |  |  |  |  |
| 4.18 (-12.50,20.85) | -0.49 (-19.26,18.28) | 0.21 (-19.02,19.44) | -2.10 (-21.34,17.13) | TAPB |  |  |  |  |
| 0.66 (-15.99,17.32) | 3.33 (-19.86,26.53) | 4.03 (-19.54,27.60) | 1.72 (-21.86,25.29) | 3.82 (-15.43,23.07) | TANB |  |  |  |
| 8.24 (-1.39,17.88) | -0.18 (-23.36,22.99) | 0.52 (-23.04,24.07) | -1.80 (-25.36,21.76) | 0.31 (-18.92,19.54) | -3.51 (-27.08,20.06) | QLB |  |  |
| -7.58 (-26.82,11.66) | 7.40 (-11.38,26.18) | 8.10 (-11.14,27.34) | 5.78 (-13.47,25.03) | 7.89 (-5.73,21.50) | 4.07 (-15.19,23.33) | 7.58 (-11.66,26.82) | ESPB |  |
| 0.92 (-21.78,23.63) | 0.08 (-16.44,16.60) | 0.78 (-27.38,28.93) | -1.54 (-29.70,26.62) | 0.57 (-24.09,25.22) | -3.25 (-31.42,24.92) | 0.26 (-27.89,28.42) | -7.32 (-31.98,17.34) | EOIPB |

| Table S4B. Node-splitting of resting VAS at 24 h | | | | | | | |
| --- | --- | --- | --- | --- | --- | --- | --- |
| Side | Direct | | Indirect | | Difference | | P>|z| |
| Coef. | Std. Err. | Coef. | Std. Err. | Coef. | Std. Err. |
| Control vs. ESPB | -6.417265 | 4.089489 | -1.015796 | 10.90382 | -5.40147 | 11.64688 | 0.643 |
| Control vs. QLB | -.6621091 | 7.86979 | -13.75582 | 16.05107 | 13.09371 | 17.87669 | 0.464 |
| Control vs. sTAPB | -.905828 | 8.10104 | -5.468795 | 8.635069 | 4.562967 | 11.84024 | 0.700 |
| EOIPB vs. sTAPB | .108889 | 7.550184 | -6.27074 | 65.54757 | 6.379629 | 65.98097 | 0.923 |
| ESPB vs. QLB | -2.25e-10 | 7.869616 | 13.09371 | 16.05132 | -13.09371 | 17.87669 | 0.464 |
| ESPB vs. sTAPB | .2466937 | 8.118016 | 5.647483 | 8.86027 | -5.400789 | 12.01693 | 0.653 |

## Section 5. Movement VAS at 6 h

|  |
| --- |
| Figure S5A. Network map of movement VAS at 6 h |

|  |
| --- |
| Figure S5B. Network forest plot of movement VAS at 6 h |

|  |
| --- |
| Figure S5C. SUCRA of movement VAS at 6 h. Control (61.1), EOIPB (52.0), ESPB (27.4), TANB (54.4), TAPB (55.0), cTPVB (47.8), sTAPB (52.3). |

| Table S5A. Netleague of movement VAS at 6 h | | | | | | |
| --- | --- | --- | --- | --- | --- | --- |
| Control |  |  |  |  |  |  |
| 4.38 (-18.49,27.24) | sTAPB |  |  |  |  |  |
| 2.21 (-13.06,17.48) | 1.34 (-19.95,22.64) | cTPVB |  |  |  |  |
| 0.63 (-14.63,15.89) | -0.24 (-21.53,21.05) | -1.58 (-23.17,20.01) | TAPB |  |  |  |
| 1.41 (-13.85,16.68) | 0.55 (-20.74,21.84) | -0.79 (-22.39,20.80) | 0.79 (-20.80,22.37) | TANB |  |  |
| 6.10 (-2.69,14.89) | 5.24 (-12.01,22.49) | 3.89 (-13.73,21.51) | 5.48 (-12.14,23.09) | 4.69 (-12.93,22.30) | ESPB |  |
| 0.79 (-20.12,21.70) | -0.08 (-15.23,15.08) | -1.42 (-27.32,24.47) | 0.16 (-25.73,26.05) | -0.63 (-26.52,25.26) | -5.31 (-28.00,17.37) | EOIPB |

| Table S5B. Node-splitting of movement VAS at 6 h | | | | | | | |
| --- | --- | --- | --- | --- | --- | --- | --- |
| Side | Direct | | Indirect | | Difference | | P>|z| |
| Coef. | Std. Err. | Coef. | Std. Err. | Coef. | Std. Err. |
| Control vs. ESPB | -6.212056 | 4.502055 | -1.467252 | 10.4781 | -4.744804 | 11.40556 | 0.677 |
| Control vs. sTAPB | -.9140851 | 7.771208 | -4.884191 | 8.557102 | 3.970106 | 11.55922 | 0.731 |
| EOIPB vs. sTAPB | -.0535699 | 6.735735 | -5.597461 | 65.10679 | 5.543891 | 65.45427 | 0.933 |
| ESPB vs. sTAPB | .6947391 | 7.810646 | 5.410251 | 8.834172 | -4.715512 | 11.7919 | 0.689 |

## Section 6. Movement VAS at 12 h

|  |
| --- |
| Figure S6A. Network map of movement VAS at 12 h |

|  |
| --- |
| Figure S6B. Network forest plot of movement VAS at 12 h |

|  |
| --- |
| Figure S6C. SUCRA of movement VAS at 12 h. Control (68.4), EOIPB (40.8), ESPB (25.4), TANB (56.7), TAPB (59.8), cTPVB (61.8), sTAPB (37.1). |

| Table S6A. Netleague of movement VAS at 12 h | | | | | | |
| --- | --- | --- | --- | --- | --- | --- |
| Control |  |  |  |  |  |  |
| 7.74 (-14.34,29.83) | sTAPB |  |  |  |  |  |
| 0.94 (-13.73,15.62) | -6.80 (-33.32,19.72) | cTPVB |  |  |  |  |
| 0.84 (-13.83,15.52) | -6.90 (-33.42,19.62) | -0.10 (-20.86,20.66) | TAPB |  |  |  |
| 1.48 (-19.28,22.24) | -6.27 (-36.58,24.05) | 0.53 (-24.89,25.96) | 0.63 (-24.79,26.06) | TANB |  |  |
| 9.66 (-2.11,21.44) | 1.92 (-17.75,21.59) | 8.72 (-10.10,27.54) | 8.82 (-10.00,27.64) | 8.19 (-15.68,32.05) | ESPB |  |
| 7.25 (-22.10,36.60) | -0.50 (-21.02,20.03) | 6.30 (-26.51,39.12) | 6.40 (-26.41,39.22) | 5.77 (-30.18,41.72) | -2.42 (-30.21,25.37) | EOIPB |

| Table S6B. Node-splitting of movement VAS at 12 h | | | | | | | |
| --- | --- | --- | --- | --- | --- | --- | --- |
| Side | Direct | | Indirect | | Difference | | P>|z| |
| Coef. | Std. Err. | Coef. | Std. Err. | Coef. | Std. Err. |
| Control vs. ESPB | -10.26262 | 6.368594 | -.5372495 | 24.83469 | -9.725374 | 25.63836 | 0.704 |
| EOIPB vs. sTAPB | -.1088889 | 10.84046 | -17.43688 | 70.35351 | 17.32799 | 71.18378 | 0.808 |
| ESPB vs. sTAPB | .6947391 | 10.89737 | 12.22741 | 30.80071 | -11.53267 | 32.67165 | 0.724 |

## Section 7. Movement VAS at 24 h

|  |
| --- |
| Figure S7A. Network map of movement VAS at 24 h |

|  |
| --- |
| Figure S7B. Network forest plot of movement VAS at 24 h |

|  |
| --- |
|  |
| Figure S7C. SUCRA of movement VAS at 24 h. Control (54.6), EOIPB (47.1), ESPB (52.4), QLB (53.9), TANB (31.9), TAPB (51.5), cTPVB (60.9), sTAPB (47.9). |

| Table S7A. Netleague of movement VAS at 24 h | | | | | | | |
| --- | --- | --- | --- | --- | --- | --- | --- |
| Control |  |  |  |  |  |  |  |
| -0.98 (-10.02,8.07) | sTAPB |  |  |  |  |  |  |
| 0.53 (-8.51,9.58) | -1.72 (-17.18,13.75) | cTPVB |  |  |  |  |  |
| 4.18 (-8.65,17.00) | -0.21 (-15.67,15.25) | 1.51 (-11.29,14.30) | TAPB |  |  |  |  |
| 0.44 (-12.35,13.23) | 3.44 (-14.50,21.37) | 5.15 (-10.54,20.85) | 3.64 (-12.05,19.34) | TANB |  |  |  |
| 6.21 (-1.23,13.64) | -0.30 (-18.21,17.61) | 1.42 (-14.25,17.09) | -0.09 (-15.76,15.58) | -3.73 (-21.84,14.38) | QLB |  |  |
| -5.83 (-20.62,8.97) | 5.47 (-9.11,20.04) | 7.18 (-4.53,18.89) | 5.67 (-6.03,17.38) | 2.03 (-12.79,16.85) | 5.76 (-9.03,20.56) | ESPB |  |
| 1.03 (-16.65,18.72) | 0.29 (-12.44,13.02) | 2.01 (-17.86,21.87) | 0.50 (-19.36,20.37) | -3.14 (-24.99,18.70) | 0.59 (-21.24,22.42) | -5.17 (-24.36,14.01) | EOIPB |

| Table S7B. Node-splitting of movement VAS at 24 h | | | | | | | |
| --- | --- | --- | --- | --- | --- | --- | --- |
| Side | Direct | | Indirect | | Difference | | P>|z| |
| Coef. | Std. Err. | Coef. | Std. Err. | Coef. | Std. Err. |
| Control vs. ESPB | -4.758354 | 3.136285 | -1.381293 | 8.516916 | -3.377061 | 9.076965 | 0.710 |
| Control vs. QLB | -.4427783 | 5.96724 | -10.66978 | 12.18025 | 10.227 | 13.56352 | 0.451 |
| Control vs. sTAPB | -.776802 | 6.208439 | -3.762451 | 6.745812 | 2.985649 | 9.167917 | 0.745 |
| EOIPB vs. sTAPB | .3106587 | 5.71942 | -4.354558 | 64.57874 | 4.665217 | 64.8315 | 0.943 |
| ESPB vs. QLB | -.063254 | 5.967107 | 10.16374 | 12.18045 | -10.227 | 13.56352 | 0.451 |
| ESPB vs. sTAPB | .6947391 | 6.219434 | 4.05275 | 6.856755 | -3.358011 | 9.257238 | 0.717 |

## Section 8. PONV

|  |
| --- |
| Figure S8A. Network map of PONV |

|  |
| --- |
| Figure S8B. Network forest plot of PONV |

|  |
| --- |
| Figure S8C. SUCRA of PONV. Control (88.8), EOIPB (48.9), ESPB (25.3), QLB (30.3), TANB (29.6), TAPB (55.8), cTAPB (39.8), cTPVB (65.4), sTAPB (66.2). |

| Table S8A. Netleague of PONV | | | | | | | | |
| --- | --- | --- | --- | --- | --- | --- | --- | --- |
| Control |  |  |  |  |  |  |  |  |
| 0.85 (-3.45,5.15) | sTAPB |  |  |  |  |  |  |  |
| 0.40 (-0.02,0.81) | 0.04 (-1.78,1.86) | cTPVB |  |  |  |  |  |  |
| 1.10 (-1.10,3.29) | 0.74 (-2.08,3.56) | 0.70 (-1.53,2.94) | cTAPB |  |  |  |  |  |
| 0.59 (-0.15,1.32) | 0.23 (-1.69,2.15) | 0.19 (-0.65,1.03) | -0.51 (-2.83,1.80) | TAPB |  |  |  |  |
| 1.25 (-0.22,2.72) | 0.90 (-1.41,3.20) | 0.86 (-0.67,2.39) | 0.15 (-2.49,2.80) | 0.67 (-0.98,2.31) | TANB |  |  |  |
| 1.25 (-0.53,3.02) | 0.89 (-1.62,3.40) | 0.85 (-0.97,2.67) | 0.15 (-2.68,2.97) | 0.66 (-0.96,2.28) | -0.01 (-2.31,2.30) | QLB |  |  |
| 1.21 (0.75,1.67) | 0.85 (-0.98,2.68) | 0.81 (0.19,1.43) | 0.11 (-2.13,2.35) | 0.62 (-0.24,1.49) | -0.04 (-1.59,1.50) | -0.04 (-1.87,1.80) | ESPB |  |
| 0.69 (-0.94,2.32) | 0.34 (-0.36,1.03) | 0.30 (-1.39,1.98) | -0.41 (-3.14,2.33) | 0.11 (-1.68,1.89) | -0.56 (-2.76,1.64) | -0.55 (-2.96,1.86) | -0.52 (-2.21,1.18) | EOIPB |

| Table S8B. Node-splitting of PONV | | | | | | | |
| --- | --- | --- | --- | --- | --- | --- | --- |
| Side | Direct | | Indirect | | Difference | | P>|z| |
| Coef. | Std. Err. | Coef. | Std. Err. | Coef. | Std. Err. |
| Control vs. EOIPB | -.6931472 | .8323804 | -1.542292 | 2.026932 | .8491445 | 2.191189 | 0.698 |
| Control vs. ESPB | -1.208182 | .2342633 | -.355977 | 2.180452 | -.8522046 | 2.193001 | 0.698 |
| Control vs. TAPB | -.5865667 | .3732576 | .2708769 | 93.94375 | -.8574435 | 93.94449 | 0.993 |
| EOIPB vs. sTAPB | .3369611 | .3556417 | -.5142071 | 2.163739 | .8511681 | 2.192778 | 0.698 |
| ESPB vs. sTAPB | -1.06e-11 | 1.983805 | .8521932 | .9348314 | -.8521932 | 2.193033 | 0.698 |
| QLB vs. TAPB | .6592456 | .8259443 | -1.055638 | 187.9923 | 1.714884 | 187.9928 | 0.993 |
